# Supplementary material
Source: MDPI journal article supplement (https://www.mdpi.com/2311-5637/8/9/462)
Supplement: s1 [file s1]

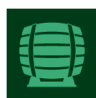

| Strains | ITS1-5.8S-ITS2 Sequence   |                |           |                       |
|---------|---------------------------|----------------|-----------|-----------------------|
|         | Closest relative          | Similarity (%) | Size (bp) | GenBank accession no. |
| BA 2-2  | <i>Aspergillus</i> sp.    | 100            | 508       | OL701322              |
| BA 1-4  | <i>Aspergillus</i> sp.    | 100            | 512       | OL701323              |
| AM 1-1  | <i>Aspergillus</i> sp.    | 97             | 504       | OL701320              |
| MM 1-1  | <i>Aspergillus</i> sp.    | 97             | 516       | OL454641              |
| MM 3-3  | <i>Aspergillus</i> sp.    | 100            | 505       | OL701315              |
| BSL 2-2 | <i>Aspergillus</i> sp.    | 100            | 501       | OL701318              |
| BA 2-3  | <i>Aspergillus</i> sp.    | 100            | 505       | OL701319              |
| BSL 3-1 | <i>Aspergillus</i> sp.    | 99.7           | 443       | OL701316              |
| BSL 1-2 | <i>Aspergillus</i> sp.    | 99.3           | 456       | OL454642              |
| MM 1-4  | <i>Penicillium</i> sp.    | 99.7           | 456       | OL454639              |
| MM 3-2  | <i>Penicillium</i> sp.    | 99.5           | 421       | ON796029              |
| BSL 3-2 | <i>Penicillium</i> sp.    | 99.7           | 415       | OL454640              |
| MM 2-3  | <i>Emericellopsis</i> sp. | 99.5           | 431       | OL701321              |
| MM 1-2  | <i>Emericellopsis</i> sp. | 99             | 469       | OL454638              |
| MM2     | <i>Emericellopsis</i> sp. | 99.5           | 470       | OL701314              |
| AM1     | <i>Emericellopsis</i> sp. | 99.5           | 470       | OL701317              |
| O       | <i>Bipolaris</i> sp.      | 100            | 446       | ON796023              |
| HT      | <i>Bipolaris</i> sp.      | 99.7           | 455       | ON796028              |
| G2      | <i>Bipolaris</i> sp.      | 99.7           | 462       | ON796026              |
| G1      | <i>Bipolaris</i> sp.      | 99.7           | 471       | ON796027              |
| HG      | <i>Bipolaris</i> sp.      | 99.3           | 469       | ON796024              |

**Table S1.** List of fungal strains used in the present study and accession numbers of their partial ITS1-5.8S-ITS2 sequence.

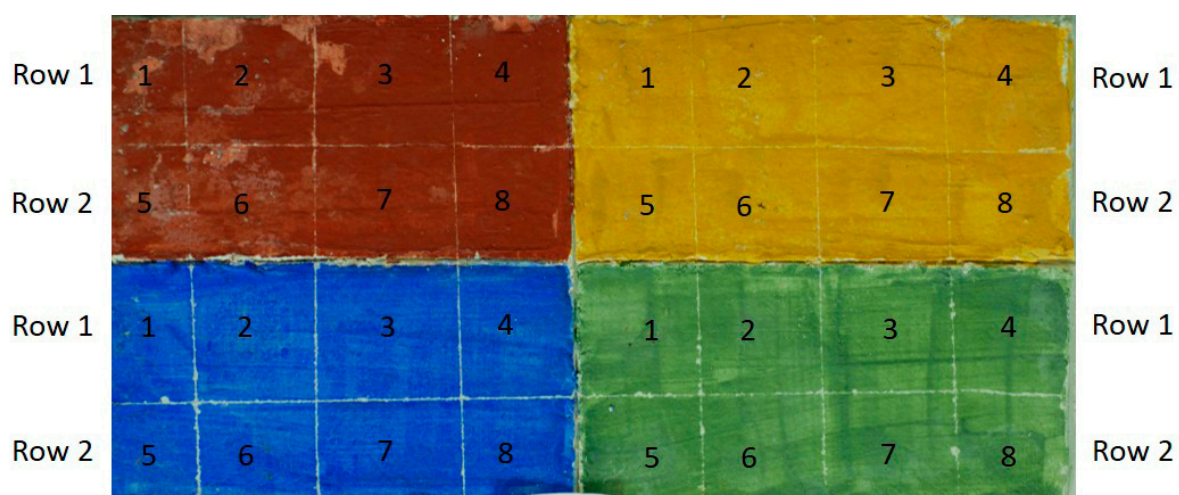

**Figure S1.** Painted laboratory models divided in squares for inoculation of fungi. Row 1.1 and Row 2.5 - inoculation with *Penicillium* sp. BSL3-2; Row 1.2 and Row 2.6 - inoculation with *Aspergillus* sp. BSL 2-2; Row 1.3 and Row 2.7 - inoculation with *Emericellopsis* sp. MM2; Row 1.4 and Row 2.8 - inoculation with strain H1.

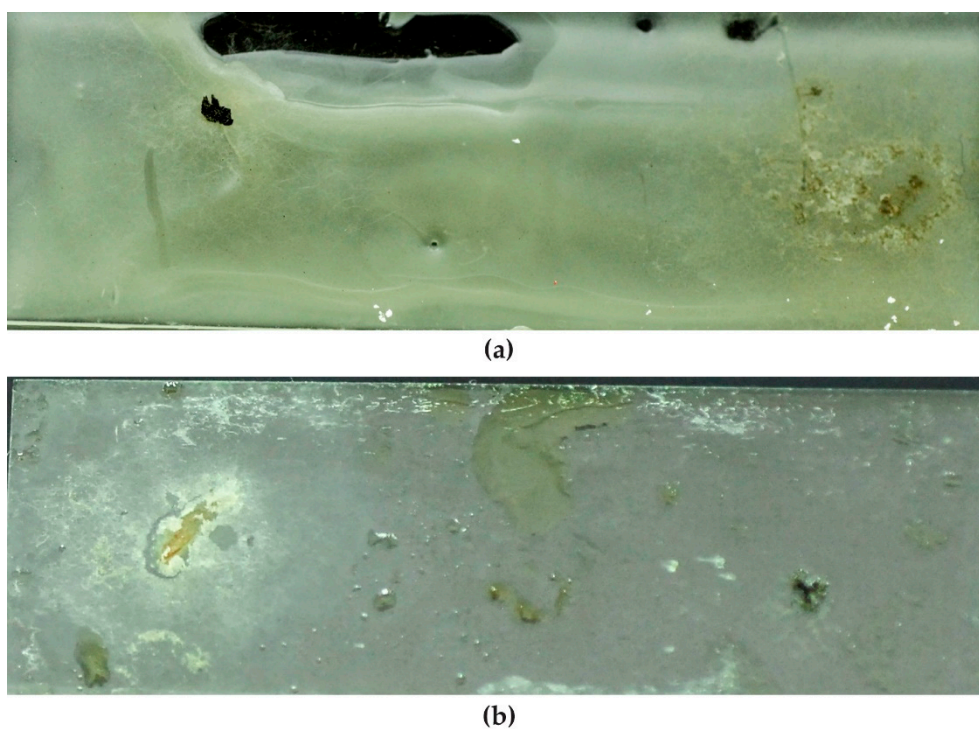

**Figure S2.** Qualitative evaluation of lipase activity by slide cultures. (a) Decomposition of beeswax by *Aspergillus* sp. BSL 1-2 and *Emericellopsis* sp. MM2; (b) Decomposition of sunflower oil by *Emericellopsis* sp. MM2 and *Penicillium* sp. BSL 3-2.



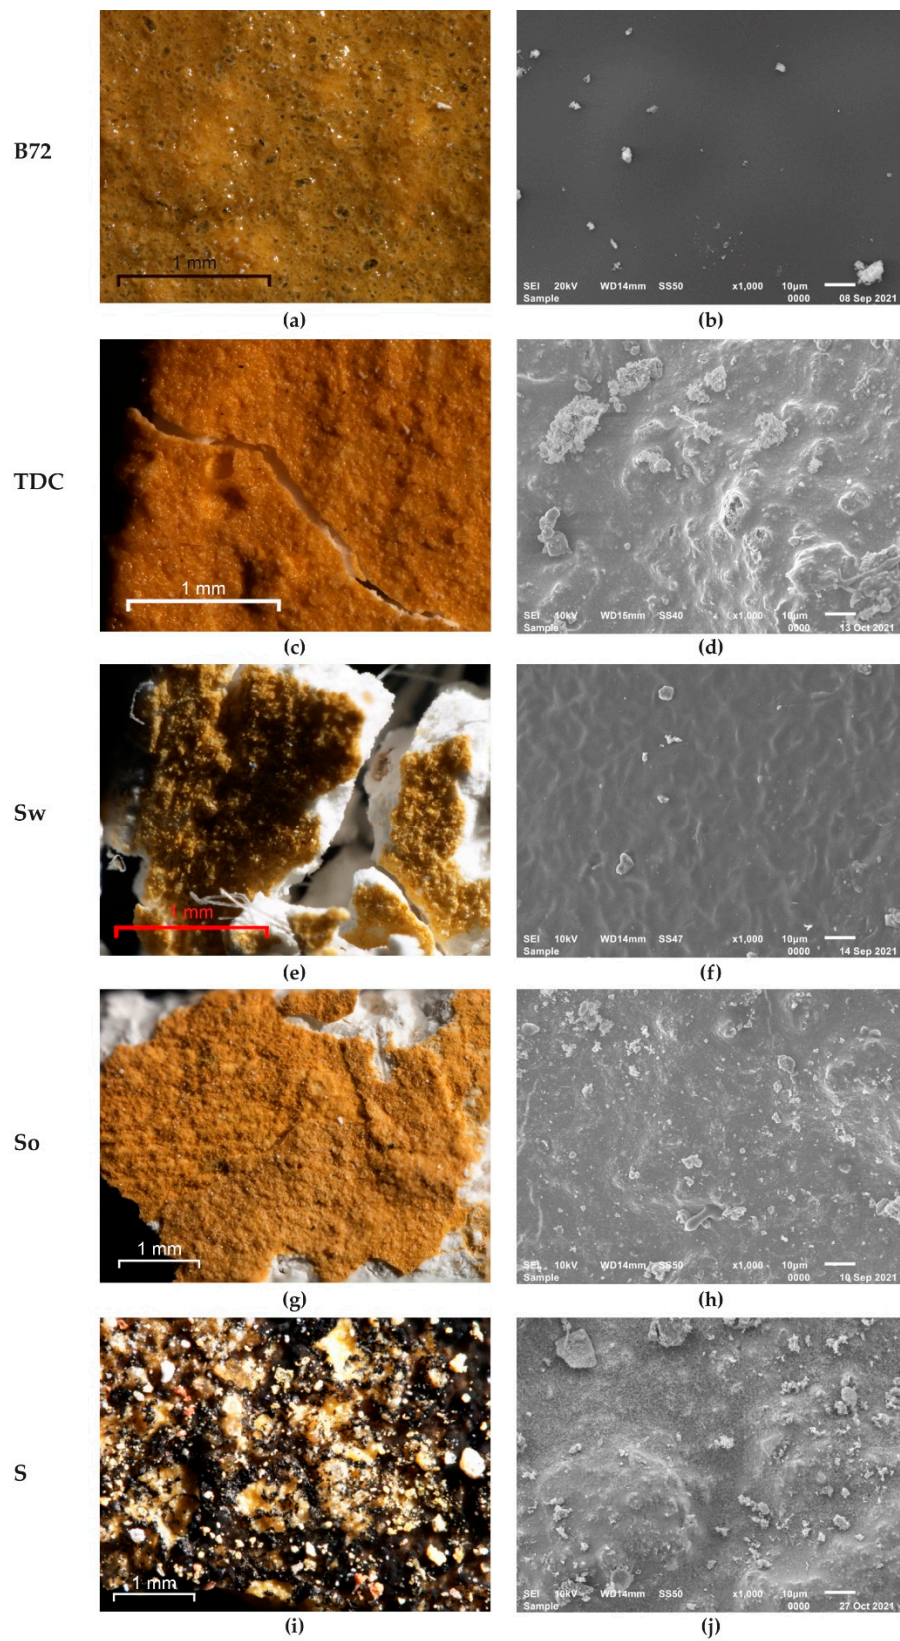

**Figure S3.** Images of morphological aspects of organic deposits on painted laboratory models (control). (a) OM on Paraloid B72 ; (b) SEM on Paraloid B72; (c) OM on TDC; (d) SEM on TDC; (e) OM on Beeswax; (f) SEM on Beeswax; (g) OM on sunflower oil; (h) SEM on sunflower oil; (i ) OM on Soot; (j) SEM on Soot.

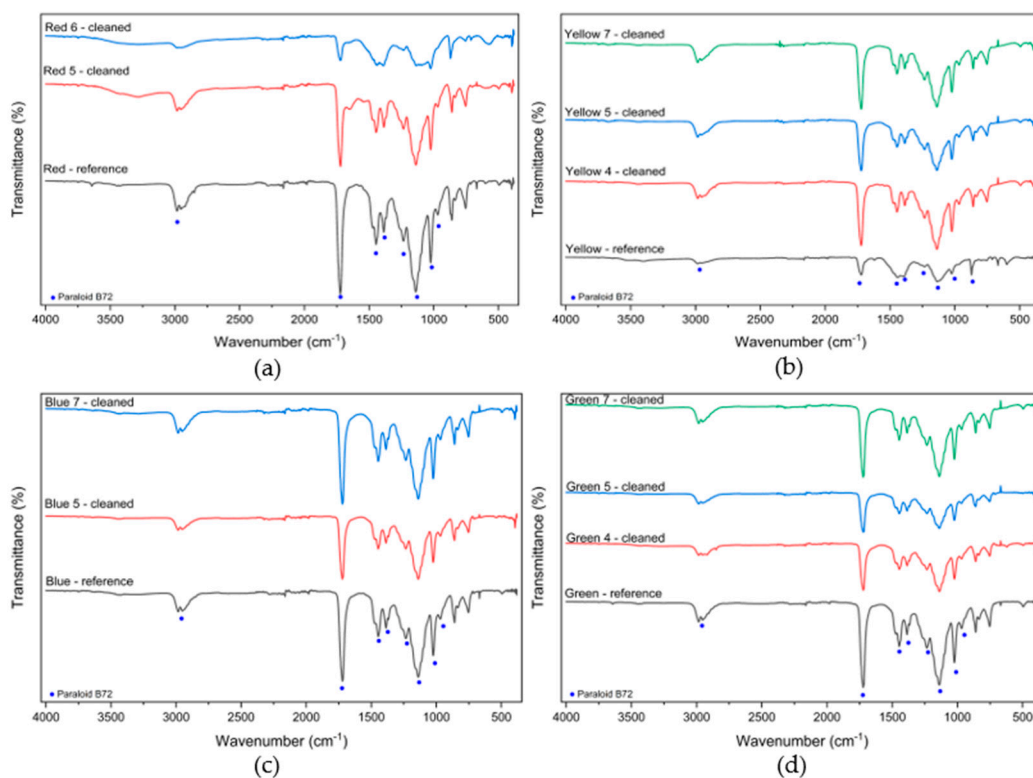

**Figure S4.** FTIR spectra acquired for the Paraloid B72 sample. (a) red square; (b) yellow square; (c) blue square; (d) green square.

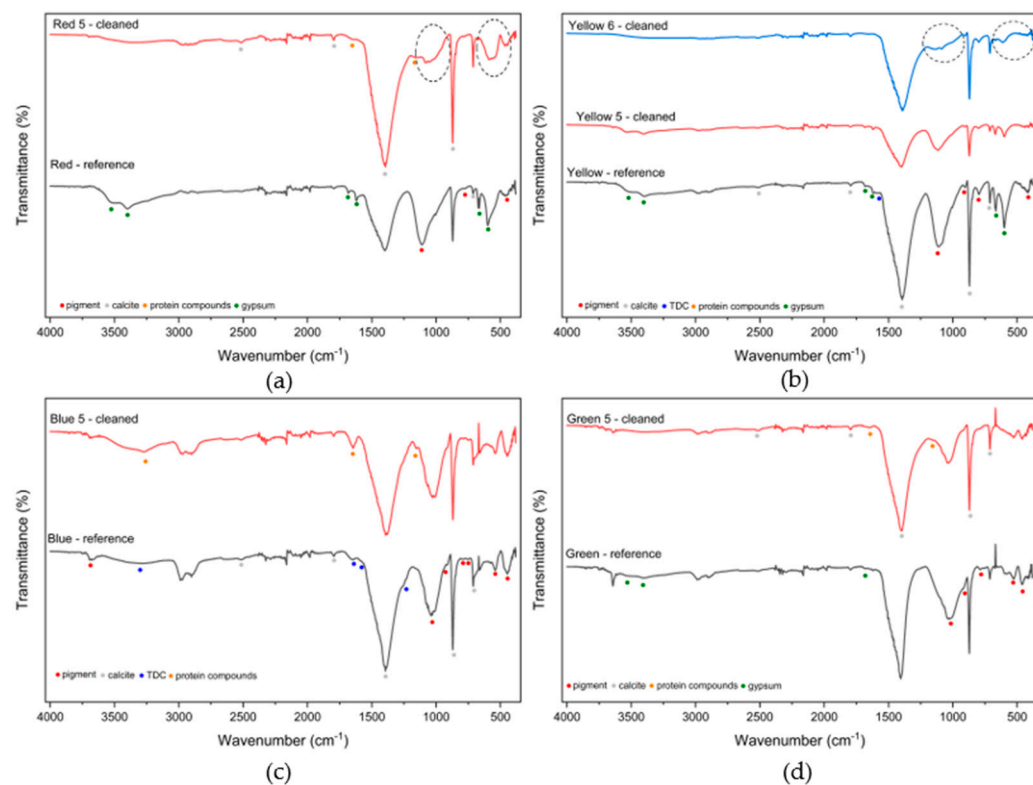

**Figure S5.** FTIR spectra acquired for the TDC sample. (a) red square; (b) yellow square; (c) blue square; (d) green square.

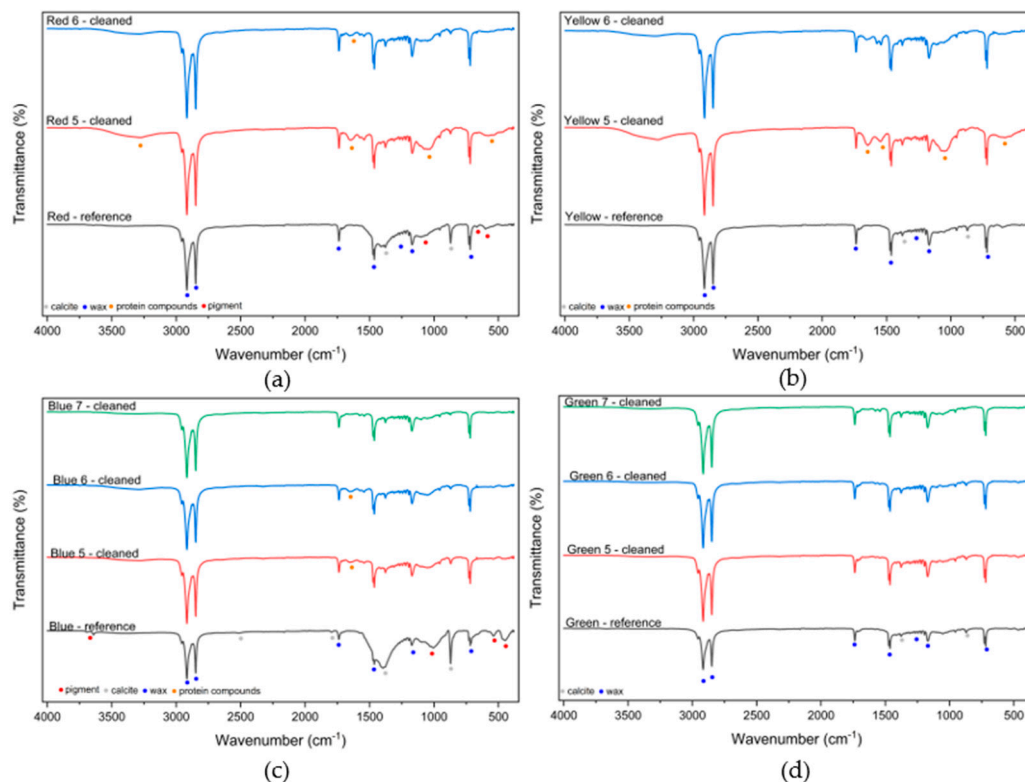

**Figure S6.** FTIR spectra acquired for BW sample. (a) red square; (b) yellow square; (c) blue square; (d) green square.

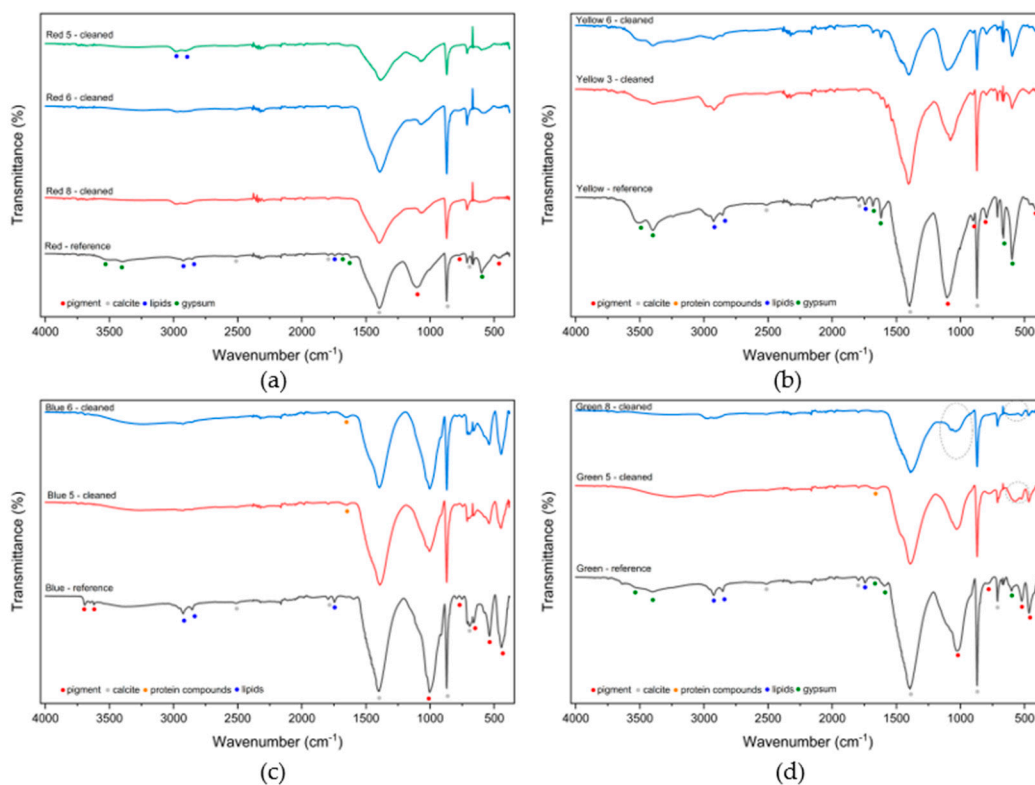

**Figure S7.** FTIR spectra acquired for the SO sample. (a) red square ; (b) yellow square; (c) blue square; (d) green square.

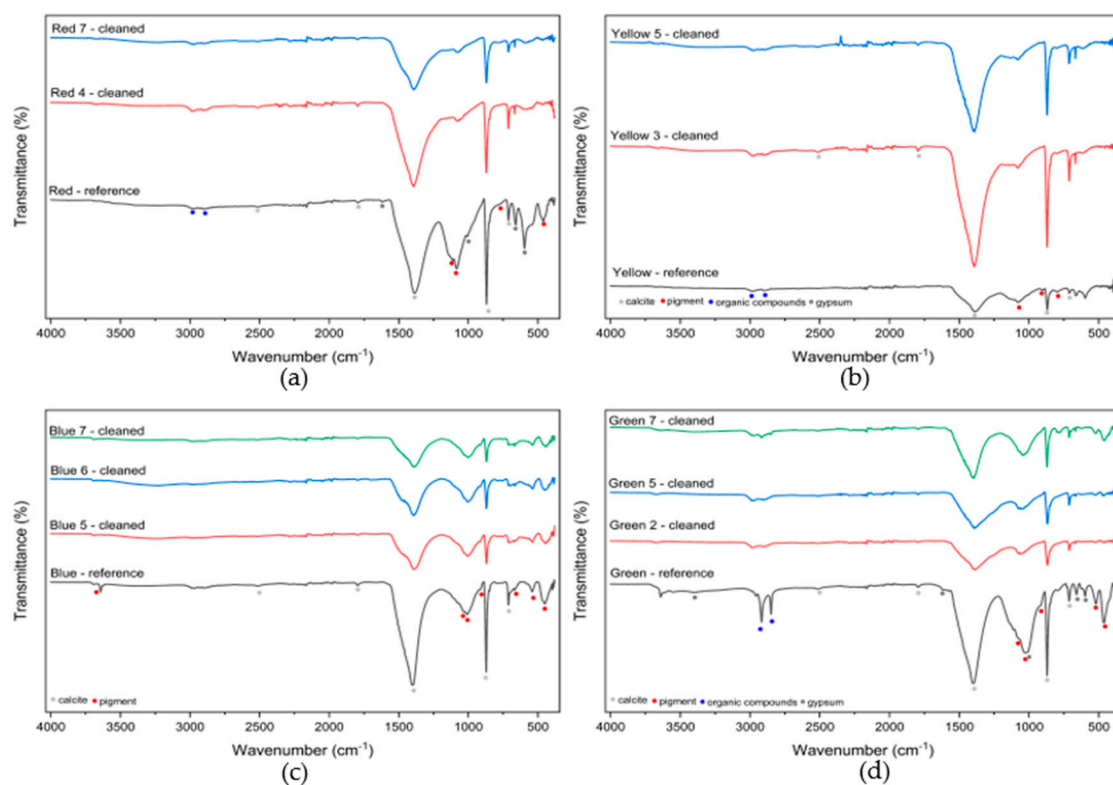

**Figure S8.** FTIR spectra acquired for the S sample. (a) red square; (b) yellow square ; (c) blue square ; (d) green square.



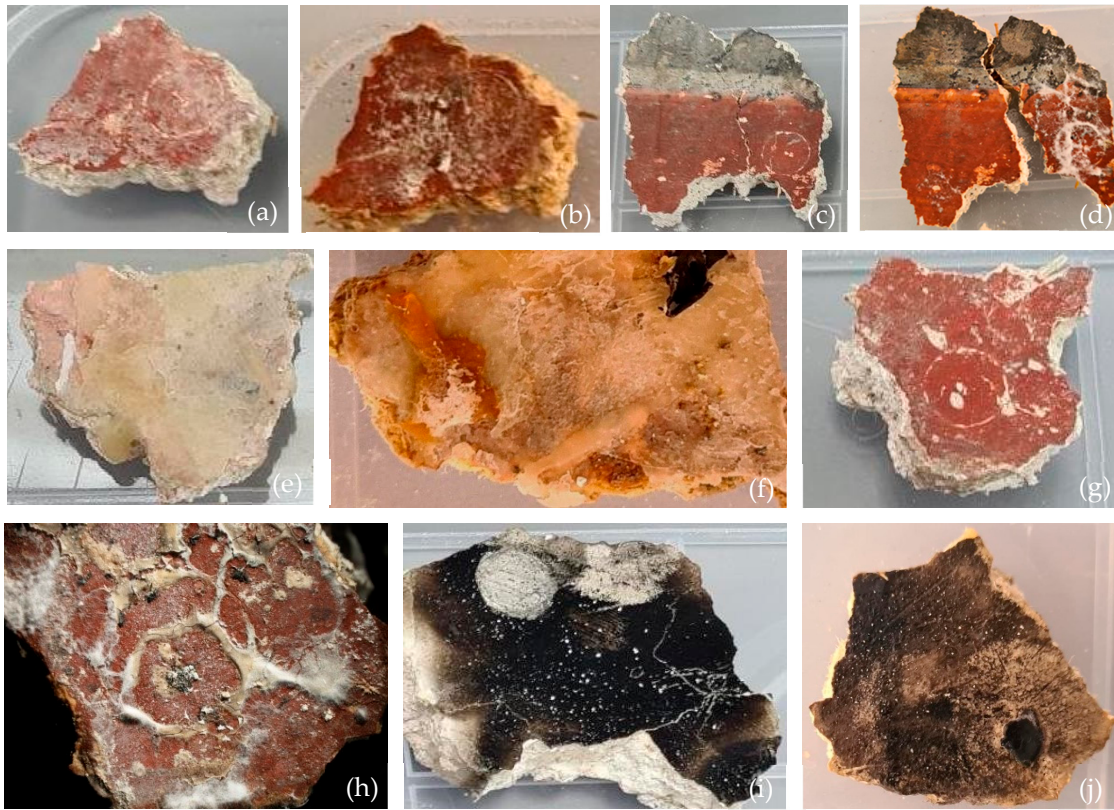

**Figure S9.** Colonization of different deposits applied on the surface of frescoes fragments by *Penicillium* sp. BSL 2-3. (a) Fresco covered with Paraloid B72 – control; (b) Fresco covered with Paraloid B72 – colonized; (c) Fresco covered with TDC – control; (d) Fresco with TDC – colonized; (e) Fresco covered with BW – control; (f) Fresco covered with BW – colonized; (g) Fresco covered with SO – control; (h) Fresco covered with SO – colonized; (i) Fresco covered with S – control; (j) Fresco covered with S – colonized.

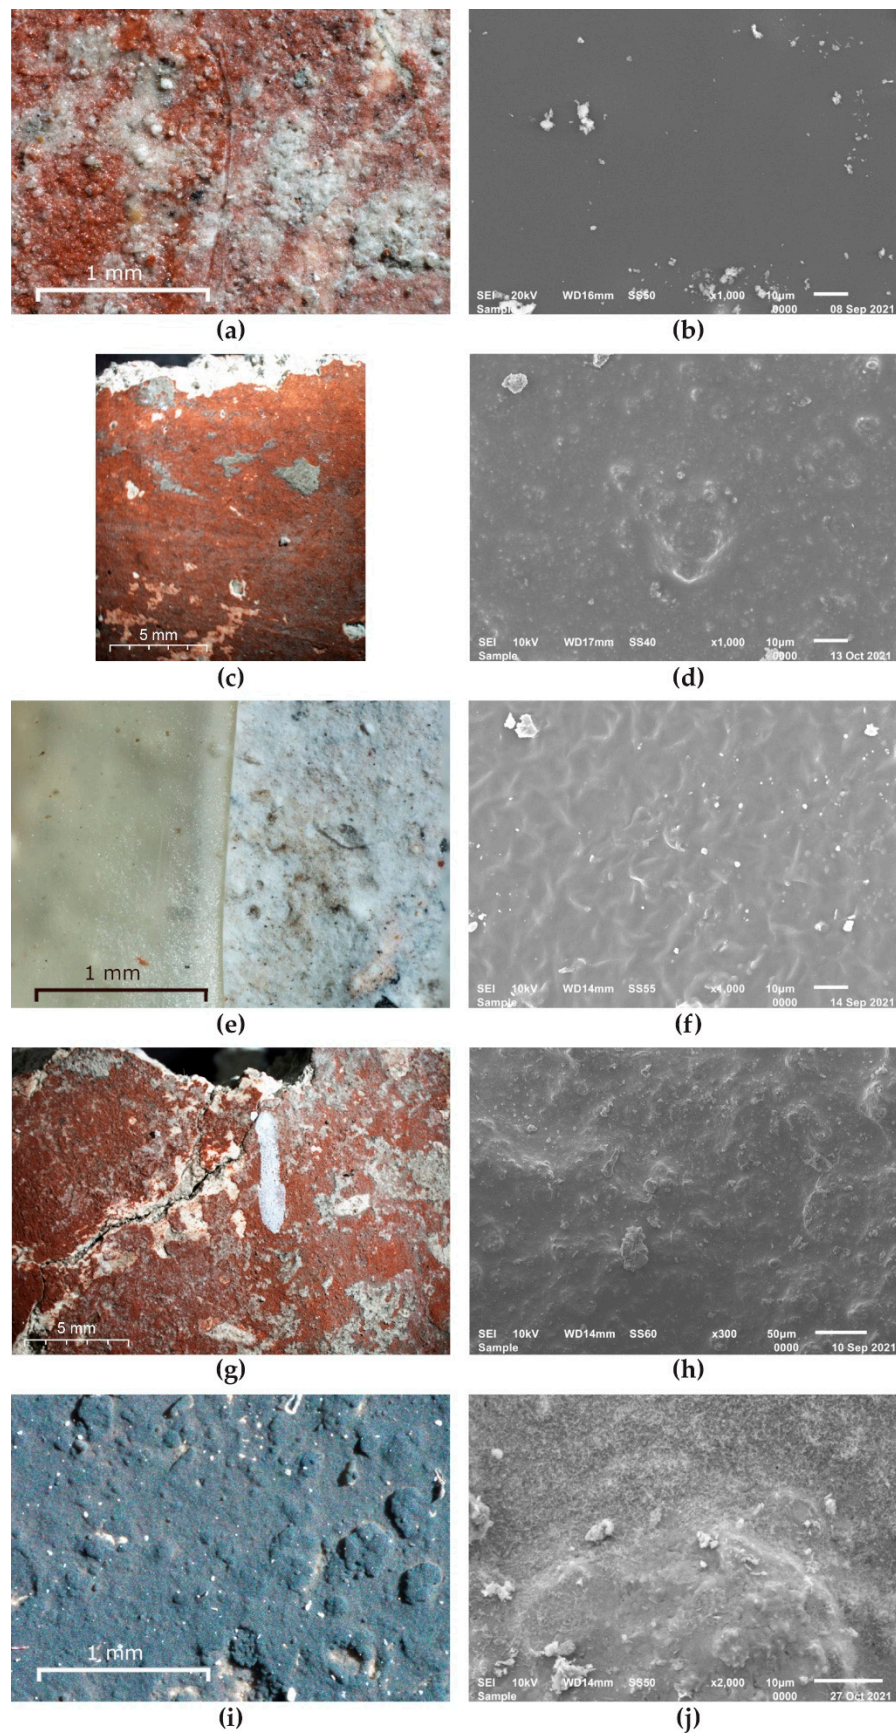

**Figure S10.** Morphological aspects of frescoes uninoculated –control. (a) OM on Paraloid B72; (b) SEM on Paraloid B72; (c) OM on TDC; (d) SEM on TDC; (e) OM on BW; (f) SEM on BW; (g) OM on SO; (h) SEM on SO; (i) OM on S; (j) SEM on S.
